# Supplementary material for: Feasibility of a Telerehabilitation Adaptation of the Be Clear Speech Treatment Program for Non-Progressive Dysarthria
Source: MDPI journal article supplement (doi:10.3390/brainsci12020197), 2022-01-31
Supplement: s1 [file s1]

**Table S1.** Be Clear: OnlineTask analysis

| Phase                       | Components            | Task                                                                             | Interaction  | Stimuli                                                                                                                             | Time                            | Client Response                                      | Technical Function                                                                          |
|-----------------------------|-----------------------|----------------------------------------------------------------------------------|--------------|-------------------------------------------------------------------------------------------------------------------------------------|---------------------------------|------------------------------------------------------|---------------------------------------------------------------------------------------------|
| Phase 1: Pre-Practice       | Extended pre-practice | Shaping and instatement of clear speech concepts                                 | Real-time    | Clinician examples of clear and unclear speech, text for reading, audio/verbal feedback on performance                              | 60 minutes at outset of program | Verbal Rating of clear speech on scale (1-10)        | VC, audio recording and playback, display text, white board rating scale                    |
| Pre-Phase 2                 | Correspondence        | Determining treatment target saliency                                            | Asynchronous | List of everyday functional phrases & service requests                                                                              | Unspecified                     | Written                                              | Emails from Clinician to Client and from Client to Clinician                                |
| Phase 2: Intensive Practice | Pre-practice          | Shaping and instatement of clear speech concepts using subset of session stimuli | Real time    | Random presentation of subset of functional phrases and service requests, reading aloud, picture description and conversation tasks | 10 minutes                      | Verbal rating of clear speech on rating scale (1-10) | VC, display text and picture stimuli, audio recording and playback, whiteboard rating scale |
| Phase 2: Intensive Practice | Practice              | Reading everyday functional phrases and                                          | Real time    | Text, and audio/verbal feedback on                                                                                                  | 20 minutes                      | Verbal rating of clear speech on rating              | VC, display text, audio recording and                                                       |

|                                             |  | service requests                                                                  |           | performance                                                    |            | scale (1-10)                                         | playback, whiteboard rating scale                                                           |
|---------------------------------------------|--|-----------------------------------------------------------------------------------|-----------|----------------------------------------------------------------|------------|------------------------------------------------------|---------------------------------------------------------------------------------------------|
| Phase 2: Practice Intensive Practice        |  | Functional speech tasks: Reading aloud; Picture description; Conversation         | Real time | Text, picture stimuli and audio/verbal feedback on performance | 30 minutes | Verbal rating of clear speech on rating scale (1-10) | VC, display text and picture stimuli, audio recording and playback, whiteboard rating scale |
| Phase 2: Home Practice Independent practice |  | Functional phrases & service requests, functional speech tasks, and transfer task | Offline   | Text                                                           | 15 minutes | Verbal                                               | USB drive, recording device such as phone                                                   |

Note: VC = videoconferencing
