# Supplementary material for: Feasibility of a Telerehabilitation Adaptation of the Be Clear Speech Treatment Program for Non-Progressive Dysarthria
Source: MDPI journal article supplement (doi:10.3390/brainsci12020197), 2022-01-31
Supplement: s1 [file s1]

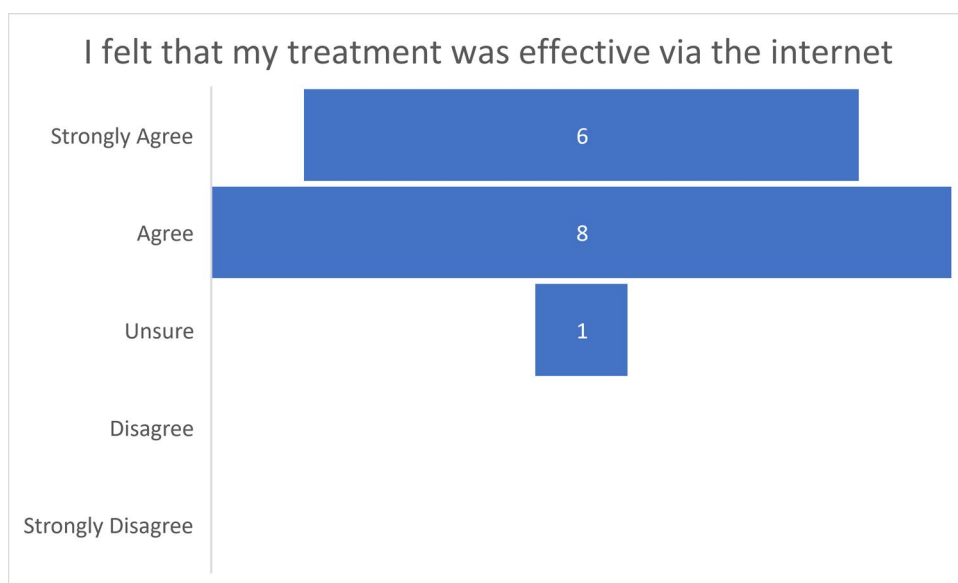

**Figure S1.** Participant ratings of online treatment effectiveness.

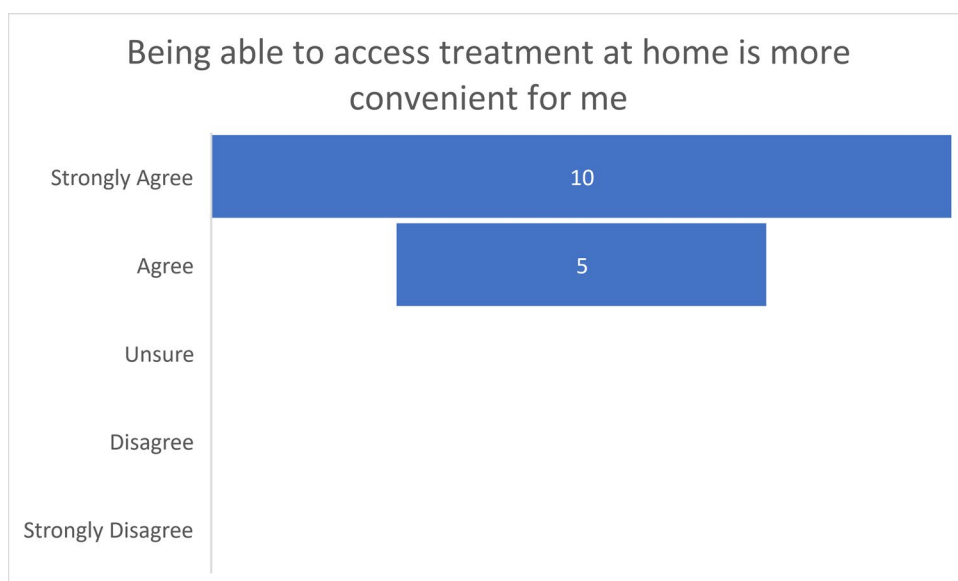

**Figure S2.** Participant ratings of online treatment convenience.

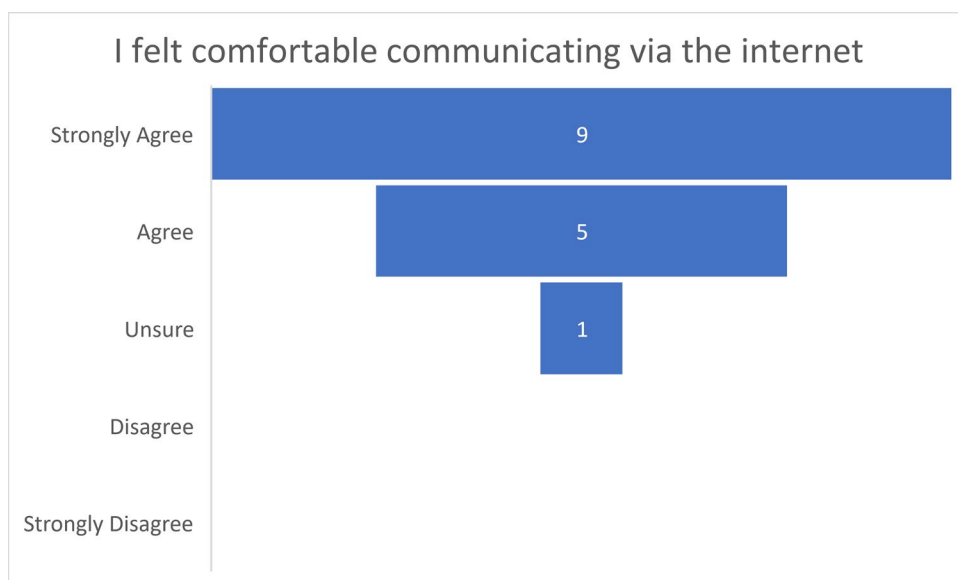

**Figure S3.** Participant ratings of comfortableness with online treatment.

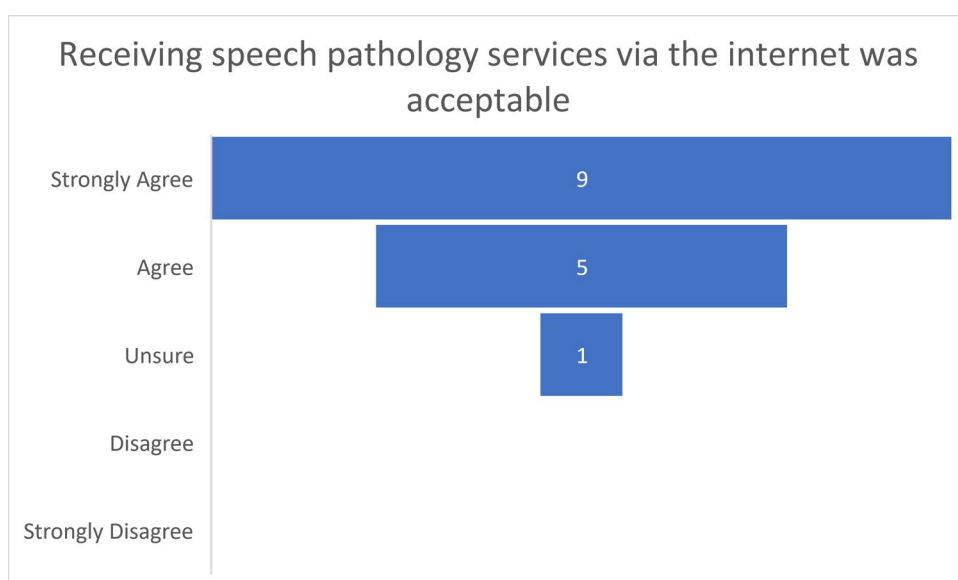

**Figure S4.** Participant ratings of online treatment acceptability

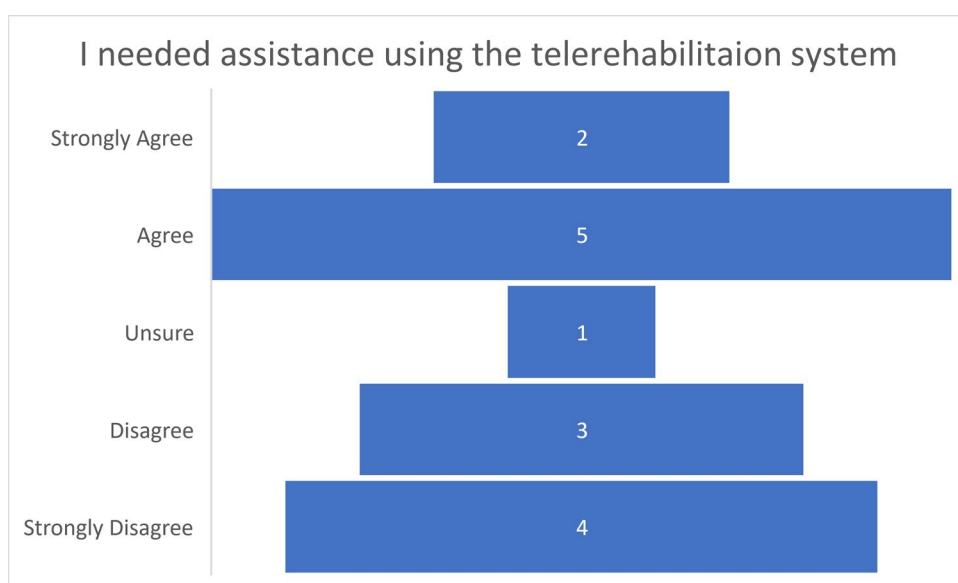

**Figure S5.** Participant ratings of required telerehabilitation system assistance.

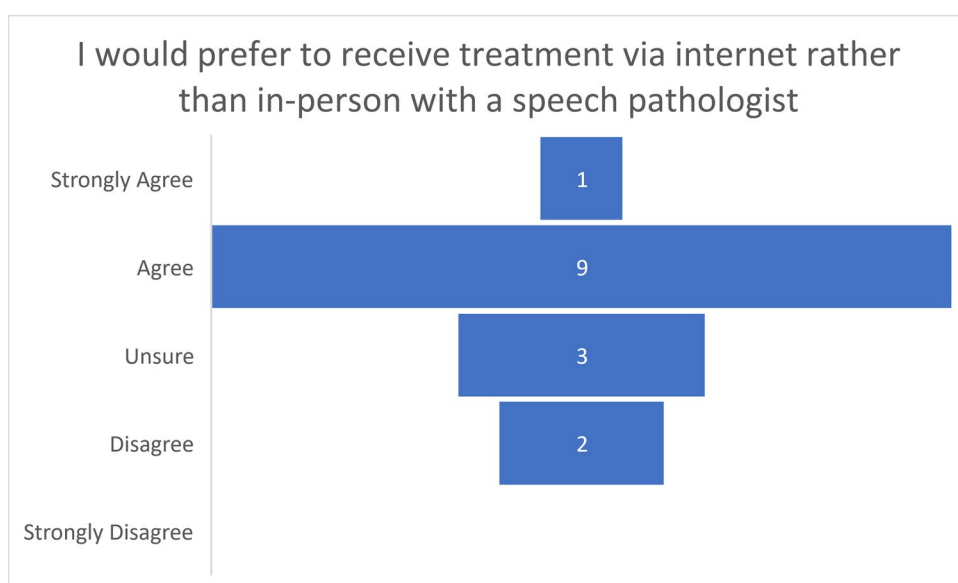

**Figure S6.** Participant preferences for service delivery.
