# Supplementary material for: Feasibility of a Telerehabilitation Adaptation of the Be Clear Speech Treatment Program for Non-Progressive Dysarthria
Source: MDPI journal article supplement (doi:10.3390/brainsci12020197), 2022-01-31
Supplement: s1 [file s1]

**Table S2.** Intra-rater reliability intraclass correlations (ICC) for 10 naïve listeners

| Rater | ICC  | 95% Confidence Interval |             | F     | p     |
|-------|------|-------------------------|-------------|-------|-------|
|       |      | Lower bound             | Upper bound |       |       |
| 1     | .699 | .051                    | .911        | 3.55  | .023  |
| 2     | .879 | .582                    | .965        | 7.85  | .001  |
| 3     | .939 | .796                    | .982        | 16.27 | .0001 |
| 4     | .814 | .324                    | .947        | 5.00  | .006  |
| 5     | .304 | -1.748                  | .806        | 1.41  | .290  |
| 6     | .294 | -1.287                  | .792        | 1.42  | .283  |
| 7     | .912 | .704                    | .974        | 12.40 | .0001 |
| 8     | .686 | -.124                   | .910        | 3.05  | .038  |
| 9     | .792 | .329                    | .939        | 5.20  | .005  |
| 10    | .807 | .299                    | .945        | 4.83  | .007  |
